# Supplementary material for: Introduction of Aethina tumida (Coleoptera: Nitidulidae) in the regions of Calabria and Sicily (southern Italy)
Source: Springer Nature journal article supplement (doi:10.1007/s13592-016-0465-3), 2016-08-24
Supplement: MOESM1 [file 13592_2016_465_MOESM1_ESM.pdf]

**Introduction of *Aethina tumida* Murray 1867 (Coleoptera: Nitidulidae) in the regions of Calabria and Sicily (Southern Italy)**

Anna Granato\*, Bianca Zecchin, Chiara Baratto, Véronique Duquesne, Enrico Negrisolò, Marie-Pierre Chauzat, Magali Ribière-Chabert, Giovanni Cattoli, Franco Mutinelli

\*Corresponding author: Anna Granato - Istituto Zooprofilattico Sperimentale delle Venezie, Viale dell'Università 10, 35020 Legnaro (Padova), Italy

email: [agranato@izsvenezie.it](mailto:agranato@izsvenezie.it)

**Figure S2.** GenBank accession numbers for each sequences are: KT380624 for *Aethina tumida*\_1\_Calabria; KT380625 for *Aethina tumida*\_53\_Sicilia; KT380626 for *Aethina tumida*\_3; KT380627 for *Aethina tumida*\_17; KT380628 for *Aethina tumida*\_12; KT380629 for *Aethina tumida*\_29; KT380630 for *Aethina tumida*\_28; KT380631 for *Aethina tumida*\_56; KT380632 for *Aethina tumida*\_20; KT380633 for *Aethina tumida*\_54; KT380634 for *Aethina tumida*\_60; KT380635 for *Aethina tumida*\_42; KT380636 for *Aethina tumida*\_52; KT380637 for *Aethina tumida*\_50; KT380638 for *Aethina tumida*\_36; KT380639 for *Aethina tumida*\_55; KT380640 for *Aethina tumida*\_51; KT380641 for *Aethina tumida*\_23; KU179764 for *Aethina tumida*\_1\_2015; KU179765 for *Aethina tumida*\_2\_2015; KU179766 for *Aethina tumida*\_3\_2015; KU179767 for *Aethina tumida*\_4\_2015.
